# Supplementary material for: Compared Heritability of Chronotype Instruments in a Single Population Sample
Source: PubMed Central journal article supplement (PMC8442136; doi:10.1177/07487304211030420), 2021-07-27

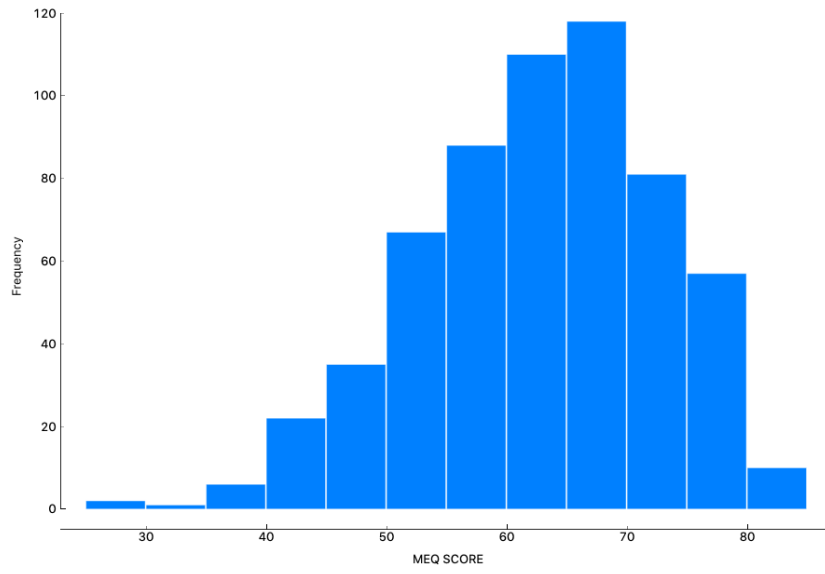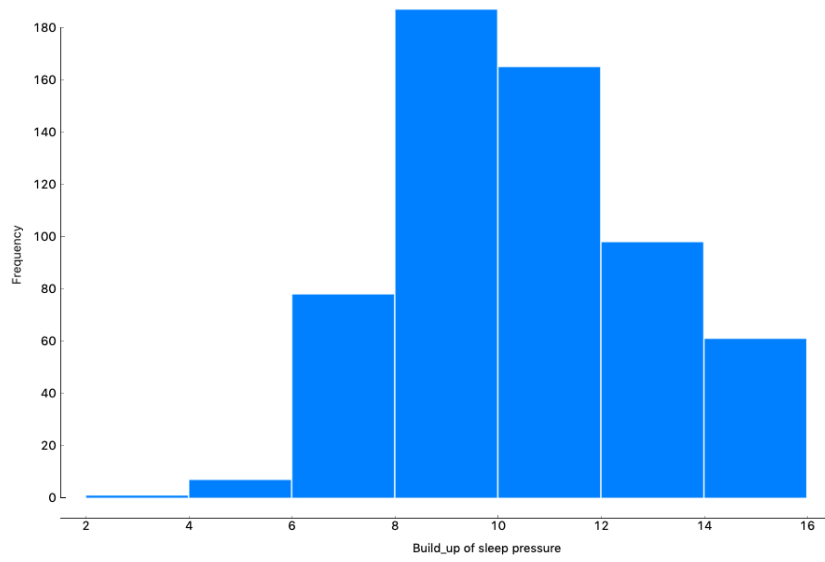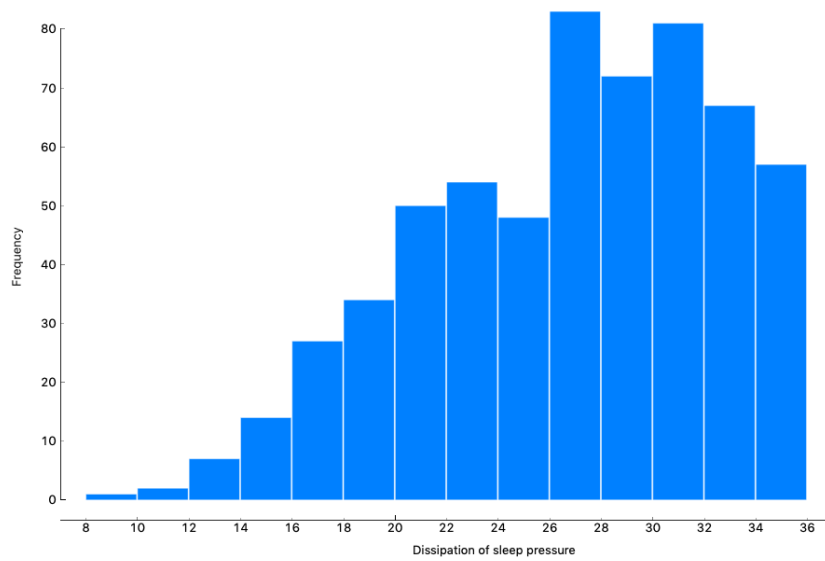

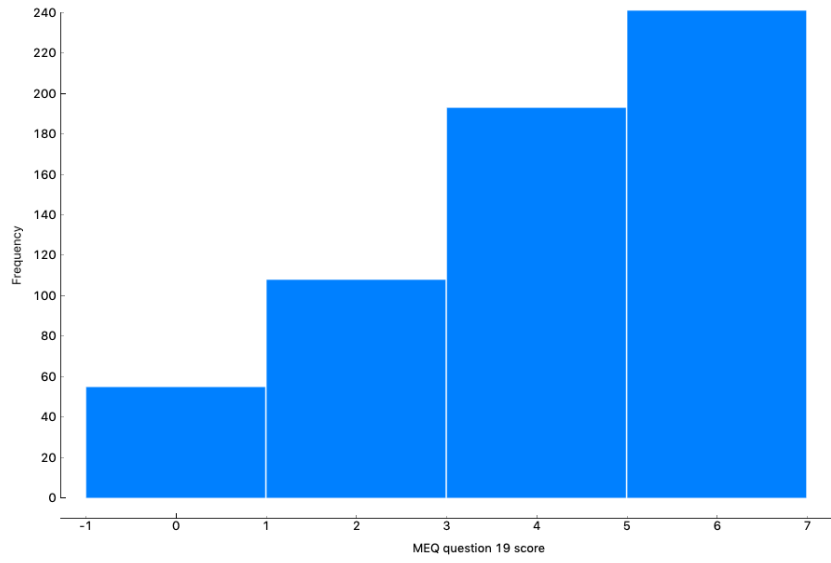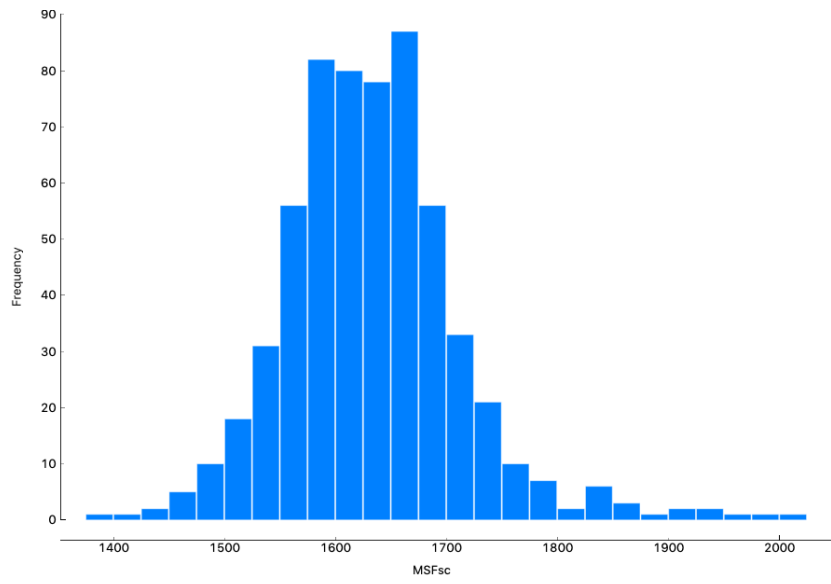

Supplement: sj-pdf-1-jbr-10.1177_07487304211030420.pdf [file sj-pdf-1-jbr-10.1177_07487304211030420.pdf]
